# Supplementary material
Source: PubMed Central journal article supplement (PMC9807056)
Supplement: NIHMS1856445-supplement-Supplemental_Figure.pdf [file NIHMS1856445-supplement-Supplemental_Figure.pdf]

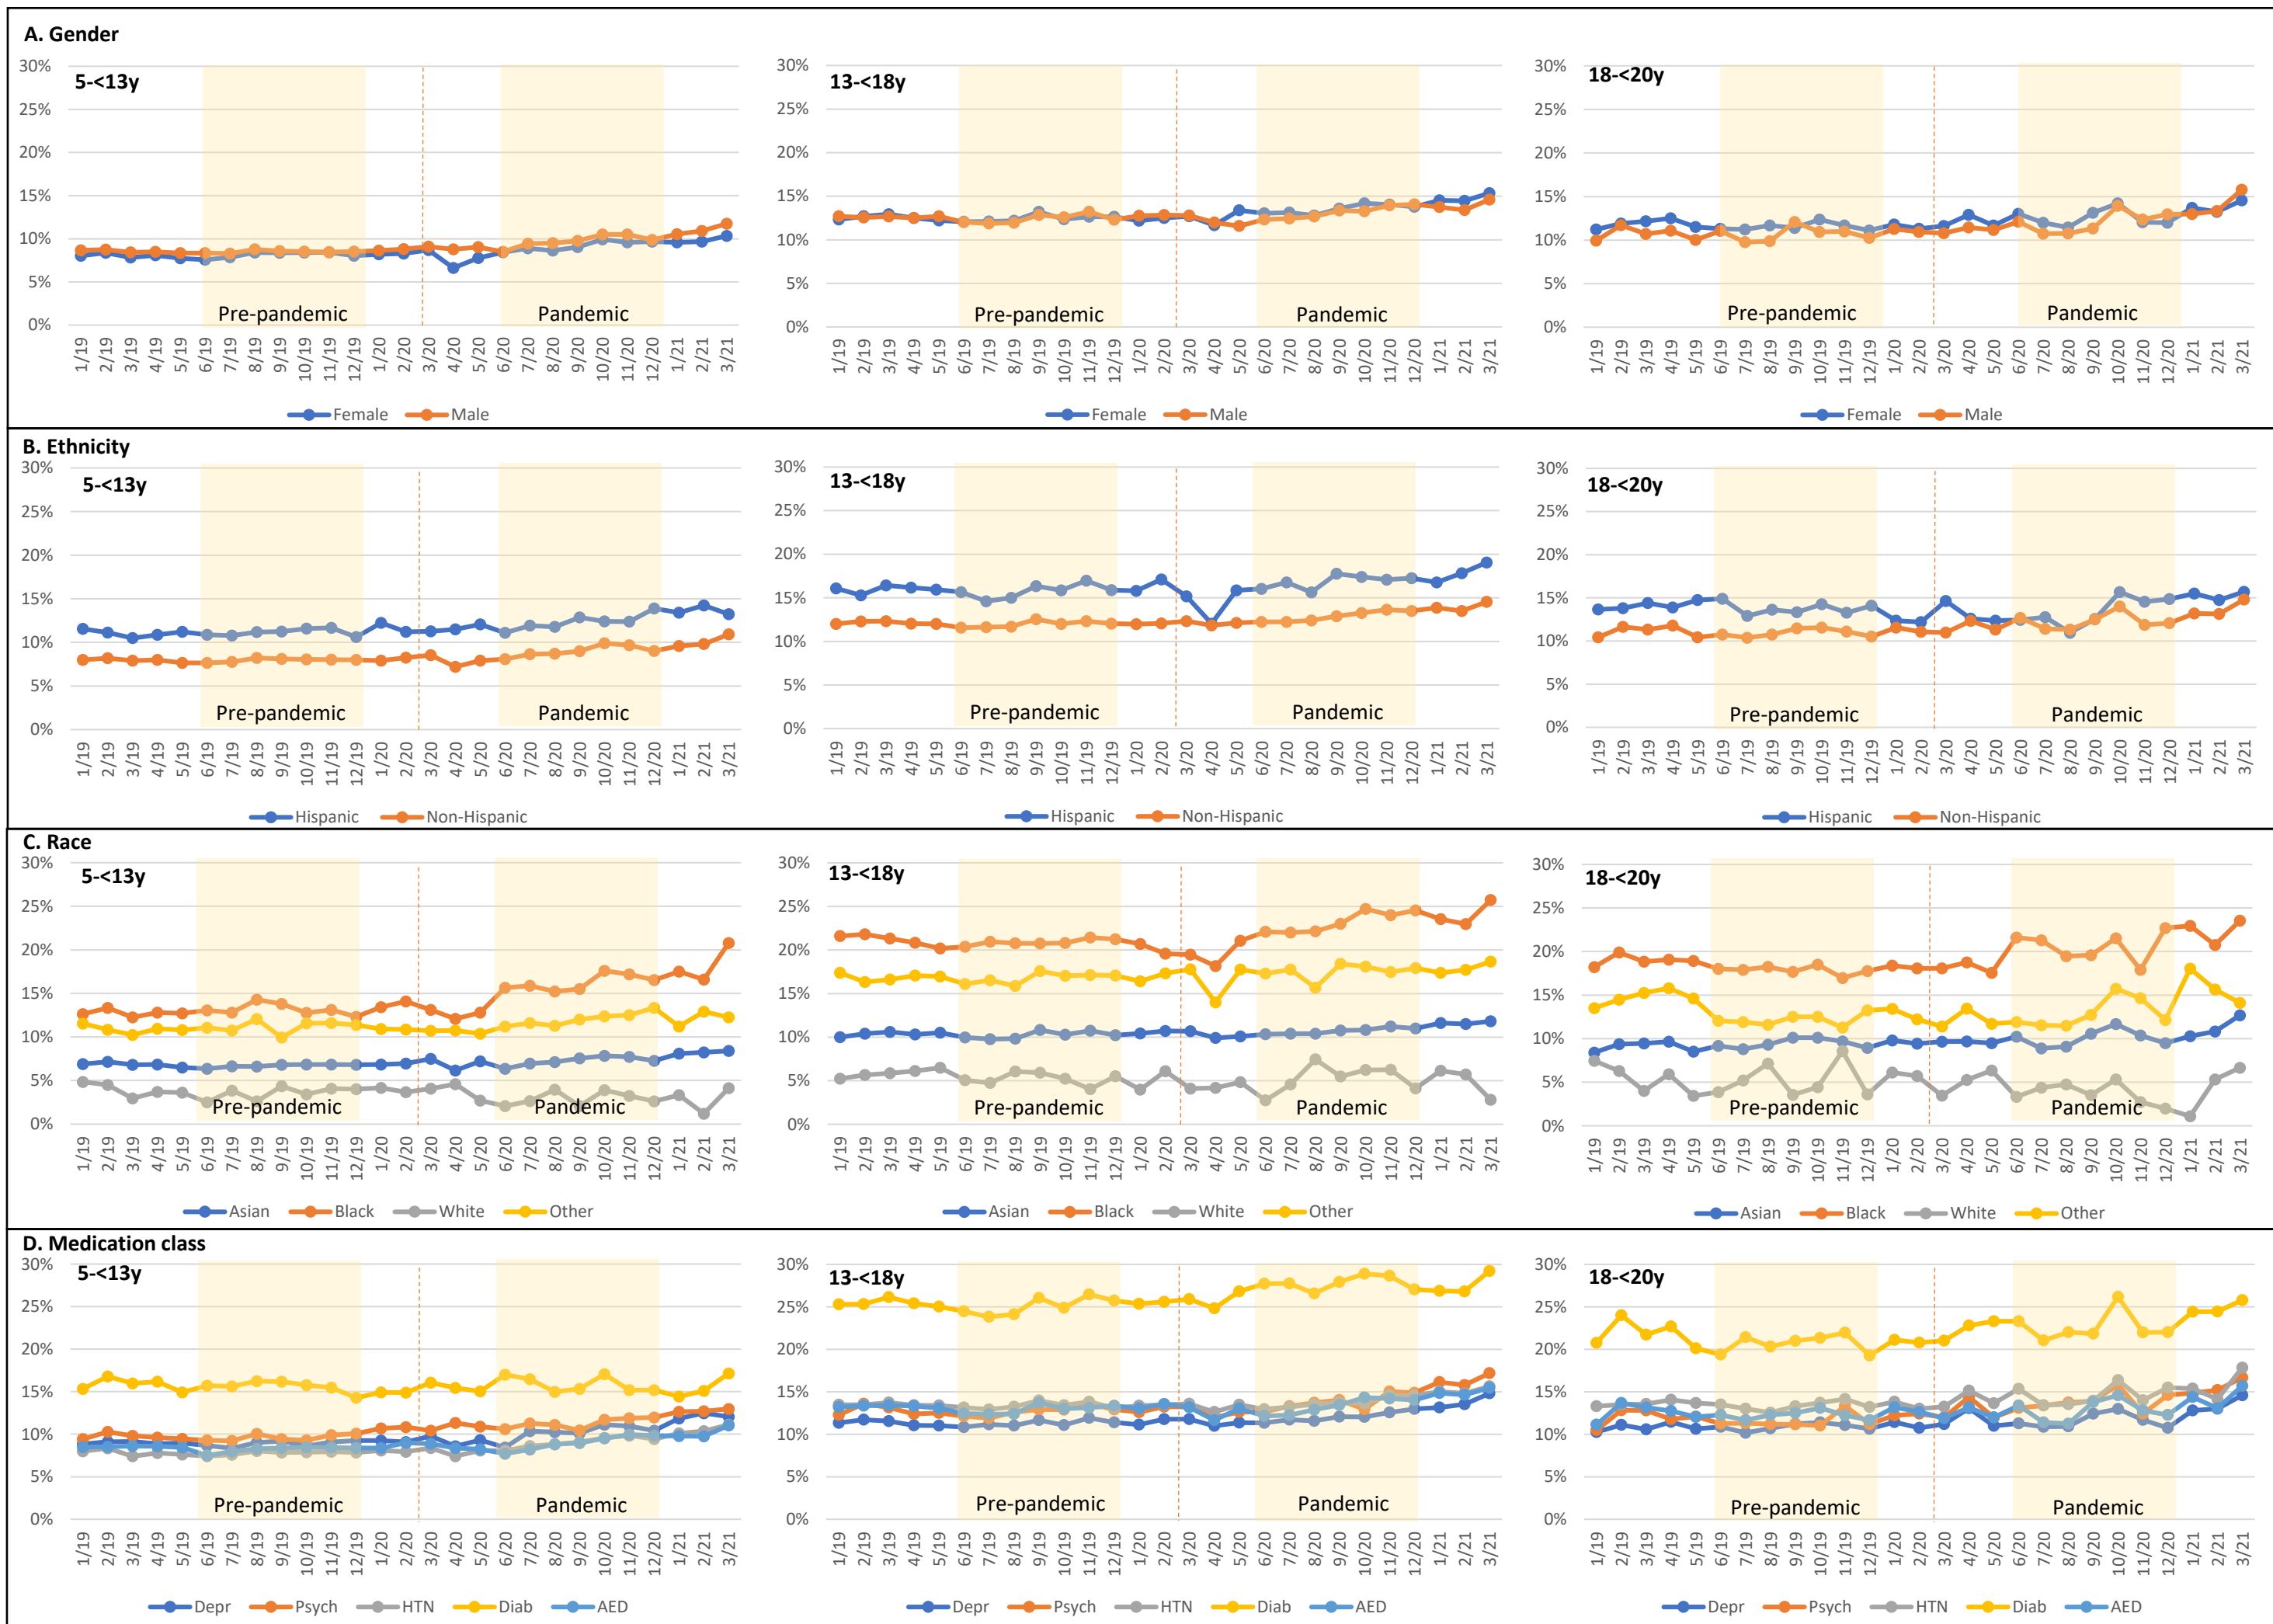

Figure S1. Severe obesity prevalence from January 2019 to March 2021 by age category and subgroups. Yellow-shaded areas represent the pre-pandemic (June-December 2019) and pandemic (June-December 2020) comparison time periods. The vertical dotted line is March 13, 2020 (date

COVID-19 declared a national emergency in the US. Severe obesity defined as defined as BMI  $\geq 120\%$  of the 95th percentile based on CDC reference data.
